# Supplementary material
Source: publisher figshare collection journal article supplement (https://acs.figshare.com/ndownloader/files/22821050)

## Supplementary Material

Figure S1 ROS levels detected by dichlorodihydrofluorescein diacetate (DCFH-DA) assay

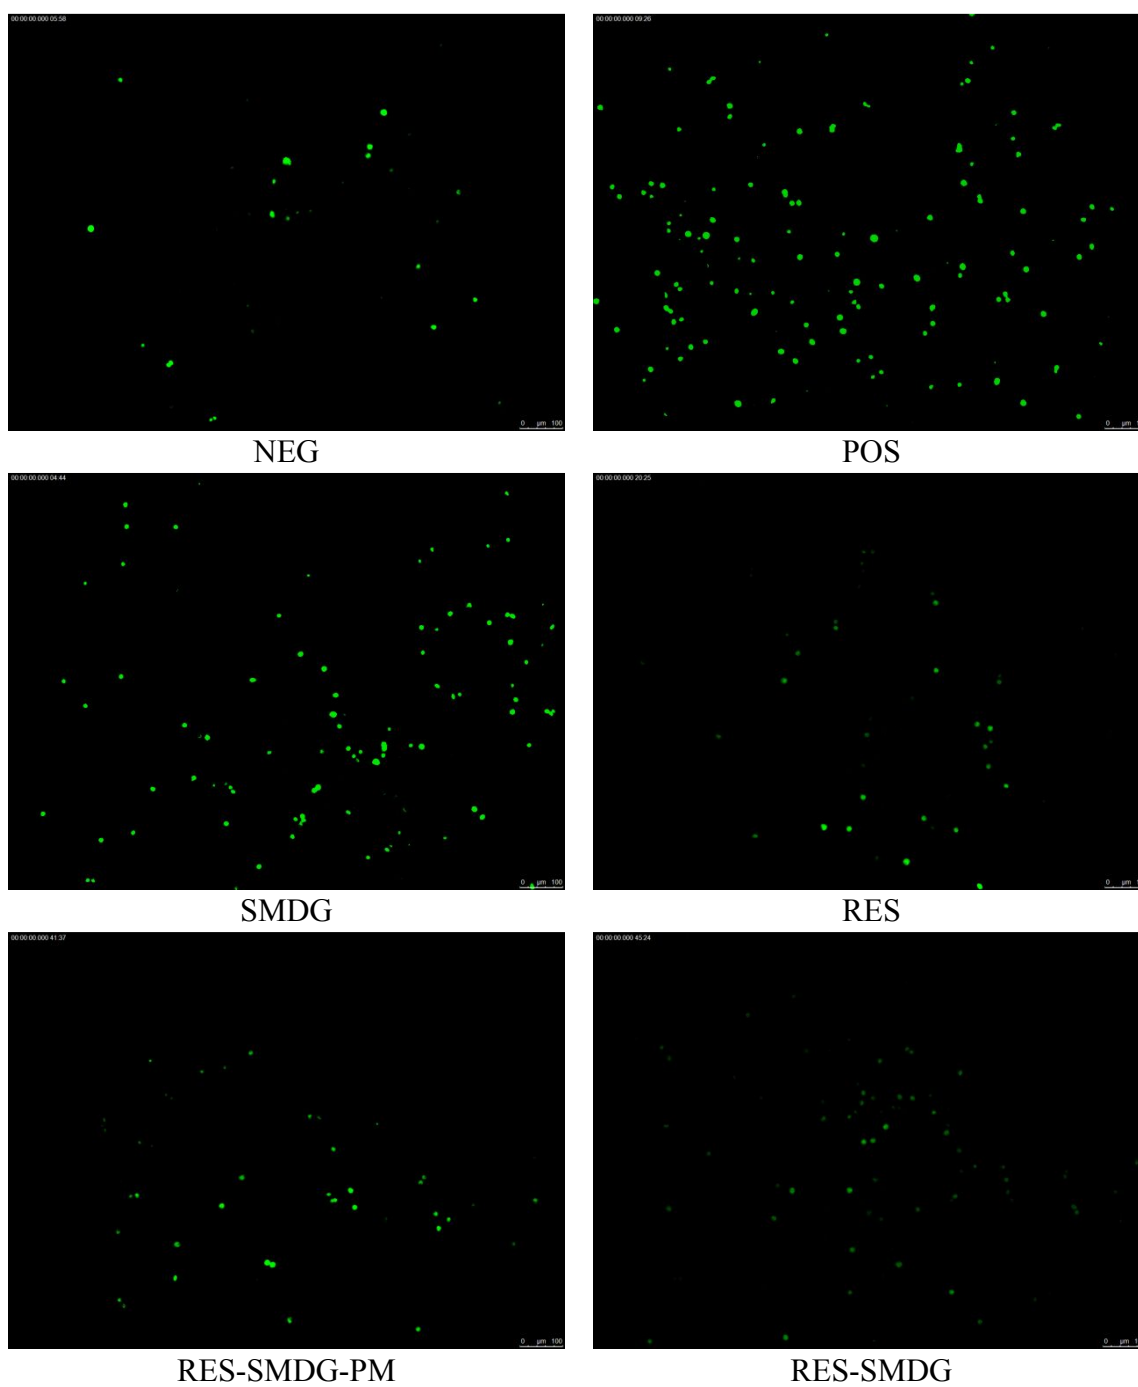

Supplement: Supplementary file 1 [file 22821050]
